# Supplementary material for: Fluorescence detection of dopamine based on nitrogen-doped graphene quantum dots and visible paper-based test strips
Source: Royal Society of Chemistry journal article supplement (doi:10.1039/c7ay00028f), 2017-01-01
Supplement: c7ay00028f1.pdf [file c7ay00028f1.pdf]

Supporting information for fluorescent detection of dopamine based on nitrogen-doped graphene quantum dots and visible paper based test strips

Xueqian Chen, Na zheng, Shufan Chen and Qiang Ma\*

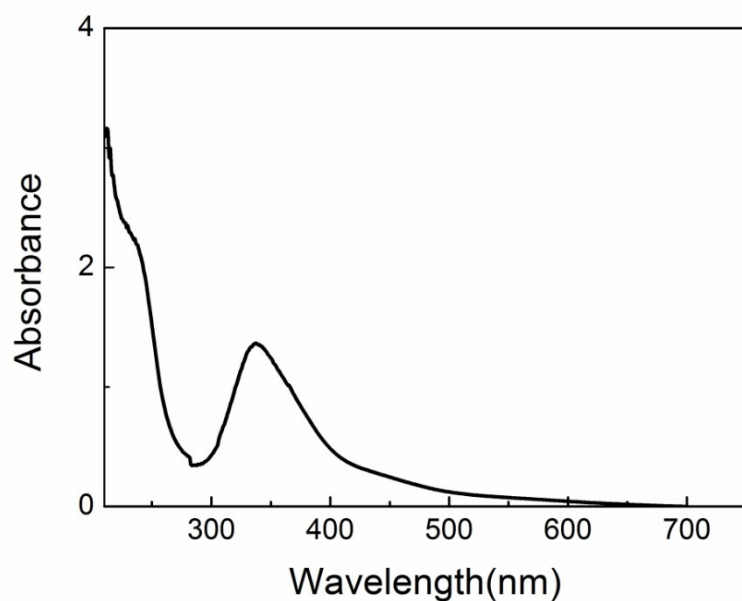

**Fig.S1** absorption spectrum of the N-GQDs.

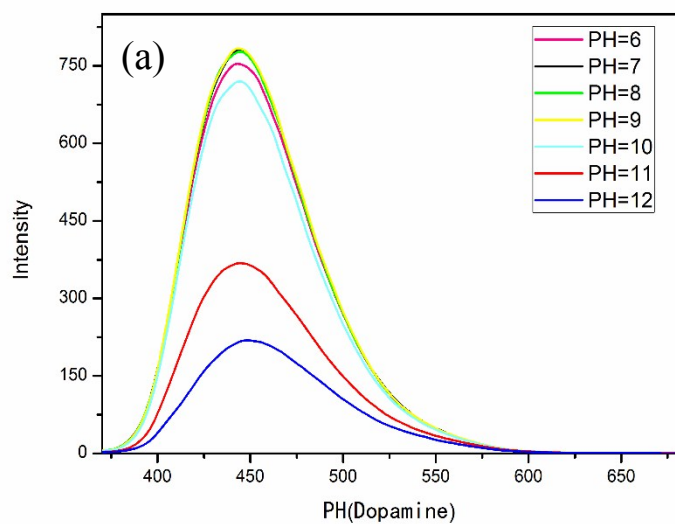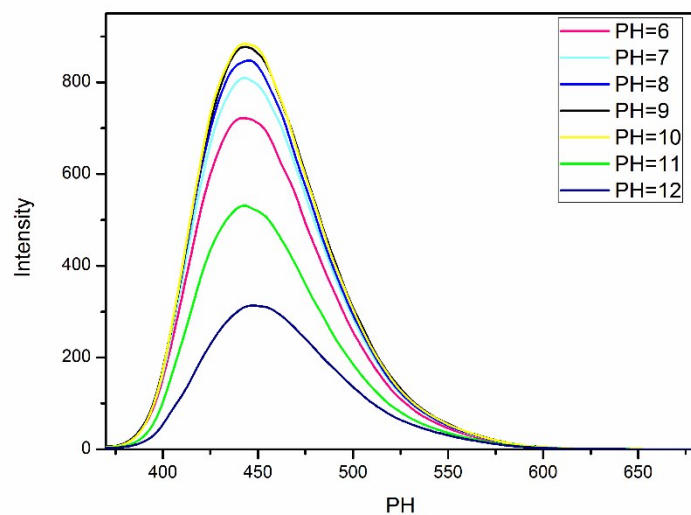

**Fig.S2(a)** the effect of pH on the fluorescence intensity of the N-GQDs. **Fig.S2(b)** the effect of pH on the fluorescence intensity of the N-GQDs/AD system.

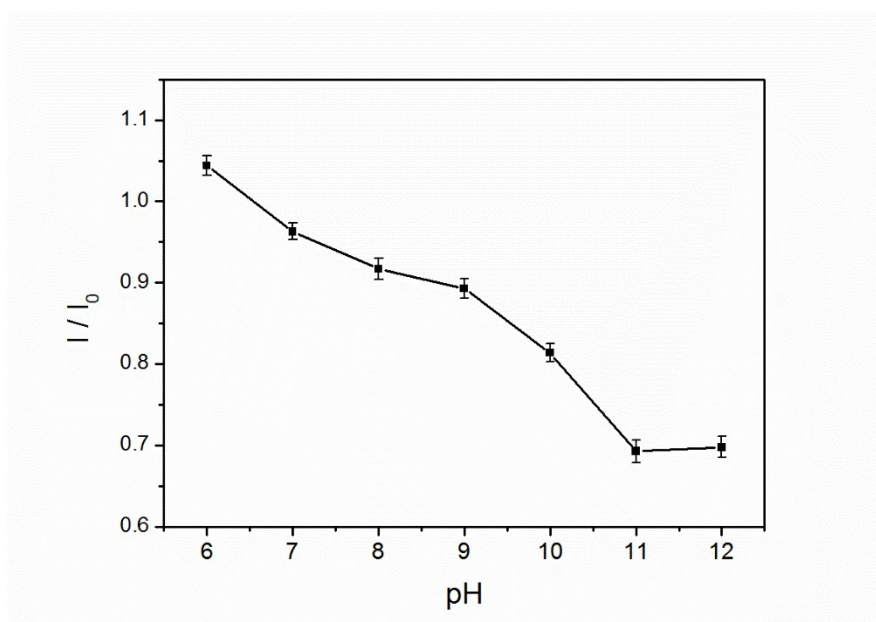

**Fig.S3** the effect of pH. The pH values were 6.0, 7.0, 8.0, 9.0, 10.0, 11.0, 12.0, respectively.  $I_0$  was the fluorescence intensity of the N-GQDs and  $I$  was the fluorescence intensity of the N-GQDs with DA. The concentration of DA was 100  $\mu\text{M}$ .

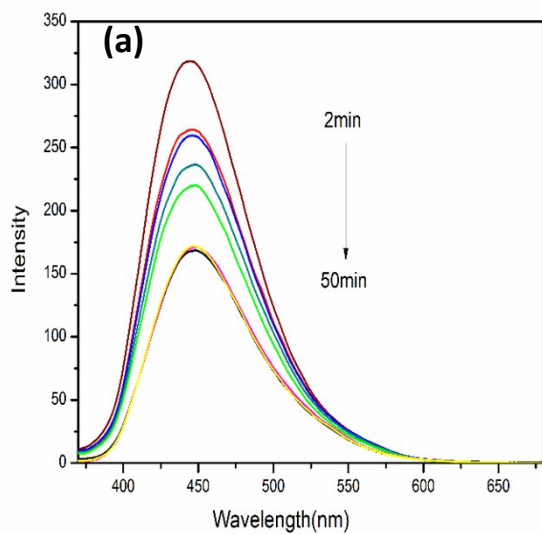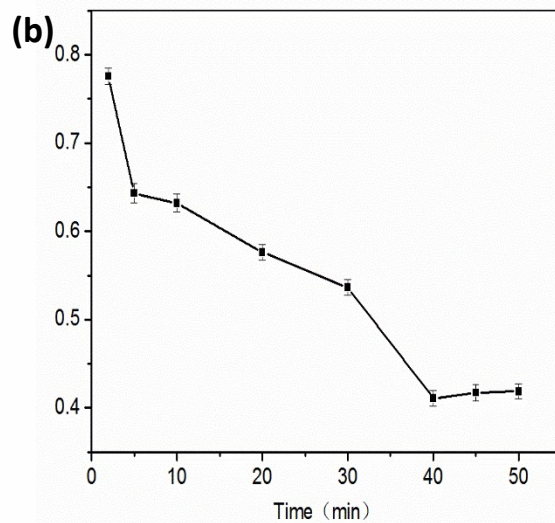

**Fig.S4** the effect of reaction time. The time were 2 min, 5 min, 10 min, 20 min, 30 min, 40 min, 45 min, 50 min, respectively.  $I_0$  was the fluorescence intensity of the N-GQDs and  $I$  was the fluorescence intensity of the N-GQDs with DA. The concentration of DA was 100  $\mu\text{mol/L}$ .

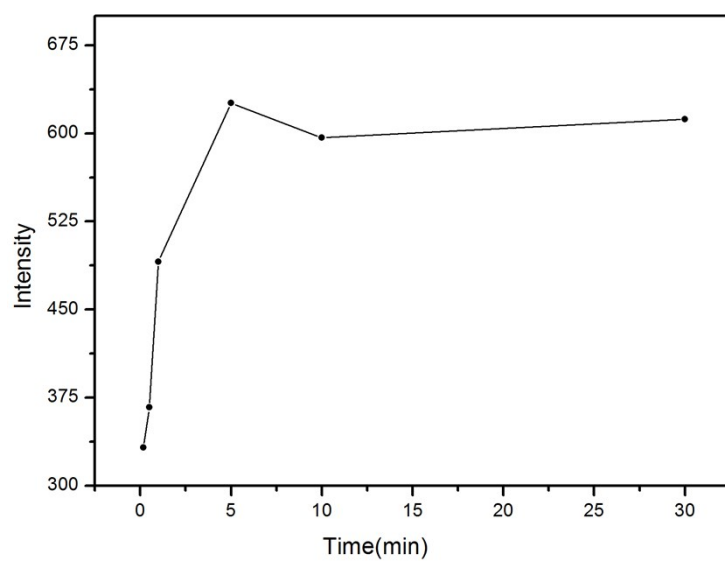

**Fig.S5** Fluorescence intensity of filter paper immersed in N-GQDs solution for different time.

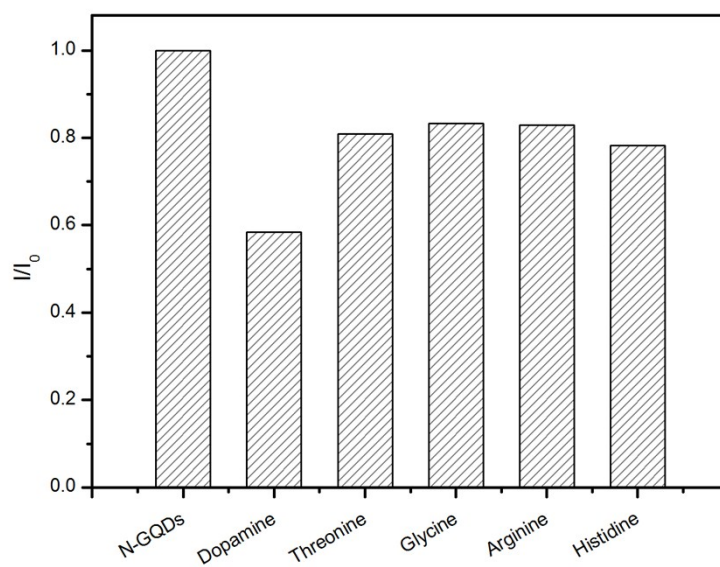

**Fig.S6** the effect of reaction substance on fluorescence intensity of N-GQDs.

**Table.S1** the interference of coexisting substances in the DA determination.

| Coexisting substance | concentration ( $\mu\text{M}$ ) | $\Delta I / I_0(\%)$ |
|----------------------|---------------------------------|----------------------|
| Threonine            | 3000                            | +0.94                |
| Arginine             | 3000                            | -3.17                |
| Histidine            | 3000                            | +7.09                |
| $\text{Mg}^{2+}$     | 3000                            | +0.69                |
| $\text{K}^+$         | 3000                            | +0.95                |
| $\text{Na}^+$        | 3000                            | +0.72                |

Note: 1.  $\Delta I = I - I_0$   $I$  and  $I_0$  was the fluorescence intensity of the N-GQDs/DA system in the absence and presence of coexisting substance, respectively.

2. The concentration of DA is 30  $\mu\text{M}$ .
